# Supplementary material
Source: PubMed Central journal article supplement (PMC2575483)
Supplement: 0808889105_0808889105SI.pdf [file 0808889105_0808889105SI.pdf]

# Supporting Information

Befroy *et al.* 10.1073/pnas.0808889105

## SI Text

### Isotopic Mass Balance Equations

#### Mass Balance:

$$\begin{aligned}d(\text{Citrate})/dt &= V_{\text{TCA}} - V_{\text{TCA}} \\d(\alpha\text{KG})/dt &= V_{\text{TCA}} + V_{\text{X}} - (V_{\text{TCA}} + V_{\text{X}}) \\d(\text{Glutamate})/dt &= V_{\text{X}} - V_{\text{X}} \\d(\text{AcetylCoA})/dt &= V_{\text{AC}} + V_{\text{PDH+FA}} - V_{\text{TCA}}\end{aligned}$$

#### Isotope Balance:

$$\begin{aligned}d(\text{C}_4\text{-Cit})/dt &= V_{\text{TCA}} (\text{C}_2\text{-AcCoA/AcCoA}) - V_{\text{TCA}}(\text{C}_4\text{-Cit/Cit}); \\d(\text{C}_4\text{-}\alpha\text{KG})/dt &= V_{\text{TCA}}(\text{C}_4\text{-Cit/Cit}) + V_{\text{X}}(\text{C}_4\text{-Glu/Glu}) - (V_{\text{TCA}} + V_{\text{X}})(\text{C}_4\text{-}\alpha\text{KG}/\alpha\text{KG}) \\d(\text{C}_4\text{-Glu})/dt &= V_{\text{X}}(\text{C}_4\text{-}\alpha\text{KG}/\alpha\text{KG}) - V_{\text{X}} (\text{C}_4\text{-Glu/Glu}); \\d(\text{C}_2\text{-AcCoA})/dt &= V_{\text{AC}}(\text{C}_2\text{-AcO/AcO}) + V_{\text{PDH+FA}}(\text{C}_0\text{-FFA/FFA}) - V_{\text{TCA}}(\text{C}_2\text{-AcCoA/AcCoA})\end{aligned}$$

#### Muscle Metabolite Concentrations:

$$\begin{aligned}\text{Acetyl CoA} &= 0.05 \mu\text{mol/g} \\ \text{Citrate} &= 0.2 \mu\text{mol/g} \\ \text{Glutamate} &= 2.41 \mu\text{mol/g} \\ \alpha\text{KG} &= 0.05 \mu\text{mol/g}\end{aligned}$$

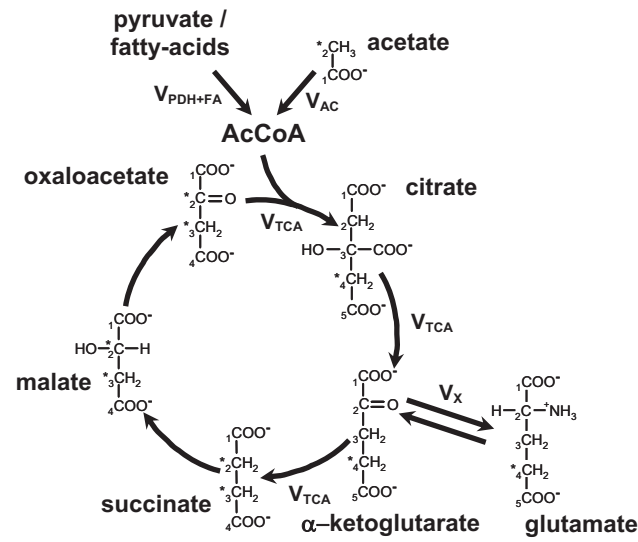

**Fig. S1.** Schematic of the TCA cycle, depicting the incorporation of <sup>13</sup>C label from plasma [2-<sup>13</sup>C]acetate into the muscle [4-<sup>13</sup>C]glutamate pool. The carbon position labeled with <sup>13</sup>C is denoted by an asterisk (\*). A single turn of the TCA cycle is shown, a 2<sup>nd</sup> turn of the cycle forms [2-<sup>13</sup>C] and [3-<sup>13</sup>C]glutamate.
